# Supplementary material for: China nationwide landscape of 16 types inherited metabolic disorders: a retrospective analysis on 372,255 clinical cases
Source: Springer Nature journal article supplement (doi:10.1186/s13023-023-02834-y), 2023-08-03
Supplement: MOESM1 [file 25884056]

**Supplementary Table 1 Assay metabolites**

| <b>ID</b> | <b>Organic acids</b>              | <b>ID</b> | <b>Amino acids and acylcarnitines</b> |
|-----------|-----------------------------------|-----------|---------------------------------------|
| 1         | Lactic acid                       | 1         | Alanine                               |
| 2         | 2-hydroxy isobutyric acid         | 2         | Aspartic acid                         |
| 3         | Hexanoic acid                     | 3         | Glutamic acid                         |
| 4         | Glycolic acid                     | 4         | Methionine                            |
| 5         | Oxalic acid                       | 5         | Phenylalanine                         |
| 6         | 2-hydroxy butyric acid            | 6         | Tyrosine                              |
| 7         | Glyoxylic acid                    | 7         | Leucine                               |
| 8         | 3-hydroxy propionic acid          | 8         | Tryptophan                            |
| 9         | Pyruvic acid                      | 9         | Valine                                |
| 10        | Valproic acid                     | 10        | Arginine                              |
| 11        | 3-hydroxy butyric acid            | 11        | Citrulline                            |
| 12        | 3-hydroxy isobutyric acid         | 12        | Glycine                               |
| 13        | 2-hydroxy isovaleric acid         | 13        | Ornithine                             |
| 14        | 2-Methyl-3-hydroxy butyric acid   | 14        | Glutamine                             |
| 15        | Malonic acid                      | 15        | Histidine                             |
| 16        | 3-hydroxy isovaleric acid         | 16        | Serine                                |
| 17        | 2-Keto isovaleric acid            | 17        | Threonine                             |
| 18        | Methylmalonic acid                | 18        | Proline                               |
| 19        | Ethylhydracrylic acid             | 19        | Free carnitine                        |
| 20        | Urea                              | 20        | Acetyl carnitine                      |
| 21        | 4-hydroxy butyric acid            | 21        | Propionyl carnitine                   |
| 22        | 2-hydroxy isocaproic acid         | 22        | Malonyl carnitine                     |
| 23        | 3-hydroxy valeric acid            | 23        | Butyryl carnitine                     |
| 24        | Acetoacetic acid                  | 24        | 3-hydroxy butyryl carnitine           |
| 25        | 2-hydroxy-3-methyl valeric acid   | 25        | Methylmalonyl carnitine               |
| 26        | Benzoic acid                      | 26        | Isovaleryl carnitine                  |
| 27        | Octanoic acid                     | 27        | Tiglyl carnitine                      |
| 28        | 2-Keto-3-methyl valeric acid      | 28        | Glutaryl carnitine                    |
| 29        | 2-Methyl-3-hydroxy valeric acid   | 29        | 3-hydroxy isovaleryl carnitine        |
| 30        | Glycerol acid                     | 30        | Hexanoyl carnitine                    |
| 31        | Phosphoric acid                   | 31        | 3-hydroxy hexanoyl carnitine          |
| 32        | Ethylmalonic acid                 | 32        | Adipyl carnitine                      |
| 33        | 2-Keto-isocaproic acid            | 33        | Octanoyl carnitine                    |
| 34        | Acetylglycine acid                | 34        | Octenoyl carnitine                    |
| 35        | Phenylacetic acid                 | 35        | Subaryl carnitine                     |
| 36        | Maleic acid                       | 36        | Decanoyl carnitine                    |
| 37        | Succinic acid                     | 37        | Decenoyl carnitine                    |
| 38        | Methylsuccinic acid               | 38        | Decadienoyl carnitine                 |
| 39        | Glyceric acid                     | 39        | Sebacyl carnitine                     |
| 40        | Uracil                            | 40        | Dodecanoyl carnitine                  |
| 41        | Fumaric acid                      | 41        | Dodecenoyl carnitine                  |
| 42        | Propionylglycine                  | 42        | 3-Hydroxydodecanoyl carnitine         |
| 43        | Mevalonolactone                   | 43        | Myristoyl carnitine                   |
| 44        | Isobutyrylglycine                 | 44        | Myristoleyl carnitine                 |
| 45        | 2-Propyl-3-hydroxy pentanoic acid | 45        | Tetradecadienoyl carnitine            |
| 46        | Methylfumaric acid                | 46        | 3-hydroxy myristoyl carnitine         |
| 47        | Glutaric acid                     | 47        | Palmitoyl carnitine                   |
| 48        | 3-Methylglutaconic acid           | 48        | Hexadecenoyl carnitine                |
| 49        | 3-Methylglutaric acid             | 49        | 3-hydroxy palmitoyl carnitine         |
| 50        | 2-Propyl-3-ketopentanoic acid     | 50        | 3-hydroxy palmitoleyl carnitine       |
| 51        | 2-Deoxytetronic acid              | 51        | Octadecanoyl carnitine                |
| 52        | Butyrylglycine                    | 52        | Octadecenoyl carnitine                |
| 53        | Glutaconic acid                   | 53        | Linoleyl carnitine                    |
| 54        | Succinylacetone                   | 54        | 3-hydroxy octadecanoyl carnitine      |
| 55        | Decanoic acid                     | 55        | 3-hydroxy octadecenoyl carnitine      |
| 56        | 2-Propyl-5-hydroxy pentanoic acid |           |                                       |

|     |                                               |  |  |
|-----|-----------------------------------------------|--|--|
| 57  | Isovalerylglycine                             |  |  |
| 58  | Malic acid                                    |  |  |
| 59  | Adipic acid                                   |  |  |
| 60  | 2-Hexenedioic acid                            |  |  |
| 61  | 5-Oxoproline                                  |  |  |
| 62  | 3-methyladipic acid                           |  |  |
| 63  | Thiodiglycolic acid                           |  |  |
| 64  | 2-Propyl-hydroxyglutaric acid                 |  |  |
| 65  | 7-hydroxy octanoic acid                       |  |  |
| 66  | 5-hydroxy-methyl-2-furoic acid                |  |  |
| 67  | Tiglylglycine                                 |  |  |
| 68  | 3-Methylcrotonylglycine                       |  |  |
| 69  | 2-hydroxy glutaric acid                       |  |  |
| 70  | 3-hydroxy glutaric acid                       |  |  |
| 71  | Phenyllactic acid                             |  |  |
| 72  | Pimelic acid                                  |  |  |
| 73  | 3-hydroxy-3-methylglutaric acid               |  |  |
| 74  | 3-hydroxy phenylacetic acid                   |  |  |
| 75  | 2-Ketoglutaric acid                           |  |  |
| 76  | 4-hydroxy benzoic acid                        |  |  |
| 77  | 4-hydroxy phenylacetic acid                   |  |  |
| 78  | Hexanoylglycine                               |  |  |
| 79  | Phenylpyruvic acid                            |  |  |
| 80  | N-Acetylaspartic acid                         |  |  |
| 81  | 2-hydroxy adipic acid                         |  |  |
| 82  | Octenedioic acid                              |  |  |
| 83  | 3-hydroxy adipic acid                         |  |  |
| 84  | Suberic acid                                  |  |  |
| 85  | 2-Keto-adipic acid                            |  |  |
| 86  | Aconitic acid                                 |  |  |
| 87  | Orotic acid                                   |  |  |
| 88  | Vanillic acid                                 |  |  |
| 89  | Homovanillic acid                             |  |  |
| 90  | Azelaic acid                                  |  |  |
| 91  | Hipupuric acid                                |  |  |
| 92  | Isocitric acid                                |  |  |
| 93  | Citric acid                                   |  |  |
| 94  | Homogentisic acid                             |  |  |
| 95  | Hippuric acid                                 |  |  |
| 96  | Methylcitric acid                             |  |  |
| 97  | 3-(3-hydroxy phenyl)-3-hydroxy propionic acid |  |  |
| 98  | 3-hydroxy octenedioic acid                    |  |  |
| 99  | 3-hydroxy suberic acid                        |  |  |
| 100 | Vanilmandelic acid                            |  |  |
| 101 | Sebacic acid                                  |  |  |
| 102 | Decadienedioic acid                           |  |  |
| 103 | 4-hydroxy phenyllactic acid                   |  |  |
| 104 | 4-hydroxy phenylpyruvic acid                  |  |  |
| 105 | Indole-3-acetic acid                          |  |  |
| 106 | Suberylglycine                                |  |  |
| 107 | Palmitic acid                                 |  |  |
| 108 | 2-hydroxy sebacic acid                        |  |  |
| 109 | 3-hydroxy sebacic acid                        |  |  |
| 110 | 2-hydroxy hippuric acid                       |  |  |
| 111 | Dodecanedioic acid                            |  |  |
| 112 | N-Acetyltyrosine                              |  |  |
| 113 | Uric acid                                     |  |  |
| 114 | 3,6-Epoxydodecanedioic acid                   |  |  |

|     |                                |  |  |
|-----|--------------------------------|--|--|
| 115 | 3-hydroxy dodecanedioic acid   |  |  |
| 116 | 3,6-Epoxytetradecanedioic acid |  |  |
