# Supplementary material for: China nationwide landscape of 16 types inherited metabolic disorders: a retrospective analysis on 372,255 clinical cases
Source: Springer Nature journal article supplement (doi:10.1186/s13023-023-02834-y), 2023-08-03
Supplement: MOESM2 [file 25884056]

**Supplementary Table 2 IMD diagnostic indicators**

| IMD                                | Organic acid indicators for IMD diagnosis                                                                       | Amino acids and acylcarnitines indicators for IMD diagnosis |
|------------------------------------|-----------------------------------------------------------------------------------------------------------------|-------------------------------------------------------------|
| <b><i>Amino acid disorders</i></b> |                                                                                                                 |                                                             |
| HPA                                | Phenylpyruvic acid; Phenylacetic acid; Phenyllactic acid ;                                                      | Phenylalanine;Tyrosine                                      |
| CD                                 | 4-hydroxy phenyllactic acid; 4-hydroxy phenylpyruvic acid;                                                      | Citrulline; Methionine;                                     |
| OTCD                               | Orotic acid; Uracil;                                                                                            | Citrulline                                                  |
| MUSD                               | 2-hydroxy isovaleric acid; 2-Keto-isovaleric acid; 2-Keto-3-methylvaleric acid; 2-Keto-isocaproic acid;         | Leucine; Valine                                             |
| CIT-I                              | Orotic acid; Uracil;                                                                                            | Citrulline                                                  |
| AKU                                | Homogentisic acid;                                                                                              | /                                                           |
| TYR-I                              | Succinylacetone;                                                                                                | Tyrosine                                                    |
| <b><i>Organic acidemias</i></b>    |                                                                                                                 |                                                             |
| MMA                                | Methylmalonic acid; Methylcitric acid;                                                                          | Propionyl carnitine;Acetyl carnitine                        |
| PA                                 | 3-hydroxy propionic acid; Methylcitric acid;                                                                    | Propionyl carnitine;Acetyl carnitine                        |
| GA-I                               | Glutaric acid; Glutaconic acid; 3-hydroxy glutaric acid;                                                        | Glutaryl carnitine                                          |
| IVA                                | Isovalerylglycine;                                                                                              | Isovaleryl carnitine                                        |
| MCD                                | Tiglylglycine; 3-Methylcrotonylglycine; 3-hydroxy isovaleric acid; 3-hydroxy propionic acid; Methylcitric acid; | 3-hydroxy isovaleryl carnitine                              |
| 3-MCCD                             | Tiglylglycine; 3-Methylcrotonylglycine; 3-hydroxy isovaleric acid;                                              | 3-hydroxy isovaleryl carnitine                              |
| MAD                                | Malonic acid;                                                                                                   | Malonyl carnitine                                           |
| MGA                                | 3-Methylglutaconic acid;                                                                                        | 3-hydroxy isovaleryl carnitine                              |
| HMGCLD                             | 3-hydroxy-3-methylglutaric acid;                                                                                | 3-hydroxy isovaleryl carnitine                              |

HPA: Hyperphenylalaninemia; CD: Citrin Deficiency Disease; OTCD: Ornithine Transcarbamylase Deficiency; MSUD: Maple Syrup Urine Disease; CIT-I: Citrullinemia Type I; AKU: Alkaptonuria; TYR-I:Tyrosinemia type I; MMA: Methylmalonic Acidemias; PA: Propionic Acidemia; GA-I: Glutaric Acidemia Type I; IVA: Isovaleric Acidemia; MCD: Multiple Carboxylase Deficiency; 3-MCCD: 3-Methyl Crotonyl-CoA Carboxylase Deficiency; MAD: Malonic Acidemia Deficiency;MGA:3-Methylglutaconyl-CoA Hydratase Deficiency; HMGCLD: 3-Hydroxy-3-Methylglutary-CoA Lyase Deficiency
